# Supplementary material for: Healthy Runner Project: a 7-year, multisite nutrition education intervention to reduce bone stress injury incidence in collegiate distance runners
Source: HighWire-hosted journal article supplement (doi:10.1136/bmjsem-2023-001545), 2023-05-01
Supplement: bmjsem-2023-001545supp001_data_supplement.pdf [file bmjsem-2023-001545supp001_data_supplement.pdf]

**Supplemental Table 1. Yearly BSI Rates by Institution in Trabecular-Rich Bone Sites**

| Phase        | Institution 1 |                       |              |      | Institution 2 |                       |              |      |
|--------------|---------------|-----------------------|--------------|------|---------------|-----------------------|--------------|------|
|              | N             | Trabecular BSI Events | Person-Years | Rate | N             | Trabecular BSI Events | Person-Years | Rate |
| Historical   |               |                       |              |      |               |                       |              |      |
| Year 1       | 21            | 8                     | 17.7         | 0.45 | 14            | 1                     | 12.2         | 0.08 |
| Year 2       | 23            | 3                     | 20.2         | 0.15 | 13            | 3                     | 12.0         | 0.25 |
| Year 3       | 22            | 5                     | 19.9         | 0.25 | 9             | 0                     | 8.2          | 0.00 |
| Total        | 36            | 16                    | 57.8         | 0.28 | 20            | 4                     | 32.3         | 0.12 |
| Pilot        |               |                       |              |      |               |                       |              |      |
| Year 1       | 17            | 1                     | 16.7         | 0.06 | 13            | 0                     | 11.9         | 0.00 |
| Year 2       | 19            | 7                     | 16.5         | 0.42 | 15            | 1                     | 13.3         | 0.08 |
| Year 3       | 22            | 6                     | 18.1         | 0.33 | 22            | 2                     | 18.7         | 0.11 |
| Total        | 31            | 14                    | 51.3         | 0.27 | 35            | 3                     | 43.8         | 0.07 |
| Intervention |               |                       |              |      |               |                       |              |      |
| Year 1       | 21            | 3                     | 19.0         | 0.16 | 28            | 2                     | 23.7         | 0.08 |
| Year 2       | 19            | 2                     | 16.5         | 0.12 | 24            | 3                     | 21.6         | 0.14 |
| Year 3       | 18            | 2                     | 16.3         | 0.12 | 20            | 0                     | 18.2         | 0.00 |
| Year 4       | 16            | 1                     | 10.4         | 0.10 | 20            | 1                     | 11.5         | 0.09 |
| Total        | 34            | 8                     | 62.2         | 0.13 | 44            | 6                     | 75.1         | 0.08 |
